# Supplementary material for: Genomic characterisation of an extended-spectrum β-Lactamase- producing Klebsiella pneumoniae isolate assigned to a novel sequence type (6914)
Source: Research Square preprint supplement (doi:10.21203/rs.3.rs-4123332/v1), 2024-03-22
Supplement: Supplementary file 2 [file 4519d574a2a899c507fdb2f3.xlsx]

## Sheet: Insertion sequence
seqID	family	cluster	isBegin	isEnd	isLen	ncopy4is	start1	end1	start2	end2	score	irId	irLen	nGaps	orfBegin	orfEnd	strand	orfLen	E-value	E-value4copy	type	ov	tir
NODE_20_length_30813_cov_189.008784	IS1	IS1_316	12459	14672	2214	1	12459	12484	14647	14672	24	19	26	0	12892	14502	+	1611	1.9e-95	1.9e-95	c	1	CTGCTGAAGCGGCTGGATCGCGAGA:CTGCTGCAGCTGCTGGGTATGGAGA
NODE_20_length_30813_cov_189.008784	IS1	IS1_316	21991	22762	772	1	21991	22015	22738	22762	38	22	25	0	22008	22705	-	698	3.8e-94	3.8e-94	c	1	GCGAAGGCGCAGACGCGCGGCAAACTGTTCCAGCGCGCGGTGTT:GCGACTGCGCATCGCTTCGGCAACCTGCACCAGAGCCTGGTGTT
NODE_20_length_30813_cov_189.008784	IS110	IS110_264	29387	30482	1096	1	29387	29422	30447	30482	24	24	36	0	29643	30322	+	680	8.1e-82	8.1e-82	c	1	ACGATCTGCTCGCTGCATCAGG:ACGATCTGGTTTATGGATCAGG
NODE_23_length_22074_cov_176.152521	IS110	IS110_140	8745	11160	2416	1	8745	8788	11117	11160	28	29	44	0	9209	11196	+	1988	3.2e-116	3.2e-116	c	1	CTAAATAGCTGCGCCTAATA:CTAAATAGCTGCGCGGAATA
NODE_4_length_401094_cov_141.830326	IS110	IS110_208	128905	131060	2156	1	128905	128926	131039	131060	20	16	22	0	129379	130870	+	1492	1.9e-54	1.9e-54	c	1	AAAACAGTGTCAGGCTAAA-CTGAAGTCTCCGGTCTTTC:AAATCAGTGCAGTGCTAAATCAGAGATCTTC-GTCTTTC
NODE_16_length_75593_cov_161.591424	IS3	IS3_176	9701	13063	3363	1	9701	9722	13042	13063	24	17	22	0	10041	12719	-	2679	4.8e-121	4.8e-121	c	1	AGTCACTGTTATCGGC:AGTTACTTTTATCGGC
NODE_1_length_1100512_cov_127.437231	IS3	IS3_204	252340	253522	1183	1	252340	252377	253485	253522	22	28	39	2	252405	253503	+	1099	5.9e-118	5.9e-118	c	1	ATATCATTAGGCACTTTTTTGAAAAA:ATATCAATAGCGTCATGTTCGAAAAA
NODE_23_length_22074_cov_176.152521	IS3	IS3_204	11770	12990	1221	1	11770	11813	12946	12990	32	32	45	1	11799	12919	-	1121	1.2e-118	1.2e-118	c	1	GCGGTAATGACTCCAACTTACTGAT:GCGGTAATGGTGCCAACTTACTGAT
NODE_3_length_520838_cov_158.733778	IS3	IS3_61	322296	323950	1655	1	322296	322366	323882	323950	34	47	71	2	322403	323766	-	1364	2.5e-129	2.5e-129	c	1	AGCGTAAAGGGGTGAAGATCAACGAGCAACTGCTGT:AGCGTGGAGGCAGGAATCTCAAGGTGCTTCTGCAGT
NODE_9_length_257080_cov_167.141796	IS3	IS3_204	225557	226767	1211	1	225557	225605	226721	226767	34	36	49	2	225617	226749	+	1133	1.7e-125	1.7e-125	c	1	CGGGTGGACCAAATGATA:CGGGAGGACACCATGATA
NODE_23_length_22074_cov_176.152521	IS5	IS5_222	7414	8478	1065	1	7414	7450	8442	8478	42	29	37	0	7474	8442	-	969	5.5e-152	5.5e-152	c	1	AATGGGCTTTGTTGAATAAATCAGATTTAGGGTAAGT:AAAGGGCTTTGTTGAATAAATCGAACTTTTGCTGAGT
NODE_1_length_1100512_cov_127.437231	IS630	IS630_214	10289	11447	1159	1	10289	10308	11428	11447	32	18	20	0	10408	11244	-	837	1.2e-171	1.2e-171	c	1	CTGACCGTTTTTCGCCATTTTCATTGCCCGCACTCCCTGTTGGT:CTGATCCGGTATCGCCACAGTAACTGCCGGAACTGCCTGCTCGT
NODE_22_length_25849_cov_165.765249	IS66	IS66_46	1	2093	2093	1	1	18	2076	2093	20	14	18	0	108	1700	-	1593	3.7e-221	3.7e-221	c	1	TGACCTGC-CCCCAGAGTTAGATACAAGCTTCAGTTAGTAATGTC:TGACCTGCTCCCCGTTGATTAATACACCGTGATGTTAGTAATGTC
NODE_31_length_5198_cov_189.665104	IS91	IS91_50	1360	3658	2299	1	1360	1377	3641	3658	24	15	18	0	1826	3319	+	1494	3.9e-229	3.9e-229	c	1	AGATAAAGAAATCAGTCGGATCAACGTCATTCAA:AGATTAAAAAGTCACTCGGTTTAGCCAGTTTCAA
NODE_11_length_172567_cov_159.139057	ISNCY	ISNCY_229	106314	107705	1392	1	106314	106338	107681	107705	26	19	25	0	106436	107365	-	930	1.4e-141	1.4e-141	c	1	CGTATGAATGCATAAA:CGTATTGATGCATAAA
NODE_14_length_86467_cov_183.229471	ISNCY	ISNCY_229	26357	27670	1314	1	26357	26400	27627	27670	32	30	44	0	26834	27742	+	909	2.6e-137	2.6e-137	c	1	CATTGCCCGGGAAAAAC-C-CCGCGGTCGGCGGC:CATCGCCCGGGCGATACGCTCCGCGGTCTGCTGC
NODE_20_length_30813_cov_189.008784	ISNCY	ISNCY_86	8506	10296	1791	1	8506	8521	10281	10296	24	14	16	0	8591	9946	-	1356	2.8e-123	2.8e-123	c	1	TCGGCCAGGATGAGCGCC:TCGGCAAGGATACGCGCC
NODE_25_length_17001_cov_161.317892	ISNCY	ISNCY_86	1117	3479	2363	1	1117	1150	3446	3479	24	23	34	0	1100	3322	+	2223	1.3e-210	1.3e-210	c	1	GATGAGCTCAACCGCGCCATCGA:GATGAGGTCAAACTGGCCGTCGA
NODE_25_length_17001_cov_161.317892	ISNCY	ISNCY_86	3819	5048	1230	1	3819	3834	5033	5048	24	14	16	0	3941	4898	+	958	5.8e-161	5.8e-161	c	1	TAGGCCGGGTAAGGCGCAGCCGCCACCCGGCGAAATCAAGGATACCGTGCCTGATATCTTGCCCGGCGGCG:TAGGCCCGTGCAAGCGCAG-CGCCGCCGGGCAATAATCAGG-CACGGTACCCGTGGTGTTGCCGGGTGGCG
NODE_2_length_592389_cov_142.820083	ISNCY	ISNCY_229	77462	78557	1096	1	77462	77493	78524	78557	24	26	34	2	77676	78638	+	963	2.5e-135	2.5e-135	c	1	ATTGAGAACTTACAAACCGTCA:ATTGTGCAGGTACAACCTGTCA
NODE_3_length_520838_cov_158.733778	ISNCY	ISNCY_229	168600	169928	1329	1	168600	168622	169906	169928	26	18	23	0	168797	169949	-	1153	6.9e-130	6.9e-130	c	1	TGCGTCAGCACTGCGACCTCG:TGCGCCAGCGCGGCGATCTCG
NODE_6_length_360786_cov_171.707326	ISNCY	ISNCY_229	25995	26823	829	1	25995	26015	26803	26823	26	17	21	0	25889	26827	+	939	1.4e-142	1.4e-142	c	1	ACGACCTCAATATCCGCCGTTACTACCGGC:ACGAGGGCAATATCCTCGGCCACTCCCCGC
NODE_6_length_360786_cov_171.707326	ISNCY	ISNCY_229	63883	65141	1259	1	63883	63912	65112	65141	24	21	30	0	63936	65004	+	1069	1.6e-140	1.6e-140	c	1	CCTGTAAGTATCCCTGTAAAACGCACCATTCACTTTTAGAGATCTTCCG:CCTGTAAGCATCCCAGCTTCA-GTTCCATGCACTTTTTGAG-TGTTCCG
