# Supplementary material for: Genomic characterisation of an extended-spectrum β-Lactamase- producing Klebsiella pneumoniae isolate assigned to a novel sequence type (6914)
Source: Research Square preprint supplement (doi:10.21203/rs.3.rs-4123332/v1), 2024-03-22
Supplement: Supplementary file 3 [file a54c1d7f41c8b26240a27527.xlsx]

## Sheet: 1
Quality Module	Isolate ID	Strain	Sequence Type	Country_Host_Sample	Genotype	Plasmid	RefSequences	QuerySequences	RefAlignedSequence%	QueryAlignedSequence%	RefTotalBases	QueryTotalBases	RefAlignedBase%	QueryAlignedBase%	RefRelocations	QueryRelocations	RefTranslocations	QueryTranslocations	RefInversions	QueryInversions	RefInsertion	QueryInsertion	RefTandemIns	QueryTandemIns	TotalSNPs	TotalIndels
Passed	GCA_009907095.1_ASM990709v1_genomic.fna	C01	1552	Nigeria_Human_High vaginal swab	aac(3)-IIa, aac(6')-Ib-cr, aac(6')-Ib-cr, aph(3'')-Ib, aph(6)-Id, blaCTX-M-15, blaOXA-1, blaSHV-62, blaTEM-1B, catB3, dfrA14, fosA6, OqxA, OqxA, OqxB, OqxB, qnrB1, sul2, tet(A)	IncFIB(K)	70	279	58(82.8571%)	220(78.8530%)	5359907	5520021	4872921(90.9143%)	4875872(88.3307%)	8	6	190	46	1	1	256	337	3	2	34657	1914
Passed	GCA_009907125.1_ASM990712v1_genomic.fna	852K	15	Nigeria_Human_Urine	aac(3)-IIa, aac(6')-Ib-cr, aac(6')-Ib-cr, aadA1, aadA2, aph(3')-VI, armA, blaCTX-M-15, blaNDM-1, blaOXA-1, blaSHV-100, catB3, dfrA12, fosA6, mph(E), msr(E), OqxA, OqxA, OqxB, OqxB, qacE, qnrB1, sul1, tet(A)	Col(BS512), IncFIA(HI1), IncFIB(K), IncFIB(pKPHS1), IncFIB(pNDM-Mar), IncHI1B(pNDM-MAR), IncR	70	206	57(81.4286%)	163(79.1262%)	5359907	5871114	4869518(90.8508%)	4879967(83.1182%)	6	7	129	46	2	4	219	415	4	2	33787	1612
Passed	GCA_009907185.1_ASM990718v1_genomic.fna	2840	13	Nigeria_Human_Urine	aac(3)-IIa, aadA2, aph(3'')-Ib, aph(3')-Ia, aph(6)-Id, blaCTX-M-15, blaSHV-101, blaTEM-1B, catA1, dfrA12, fosA6, mph(A), OqxA, OqxA, OqxB, OqxB, qacE, sul1, sul2	IncFIB(K), IncR	70	146	61(87.1429%)	106(72.6027%)	5359907	5607401	4860818(90.6885%)	4864789(86.7566%)	17	10	89	49	1	2	221	365	6	5	35312	1711
Passed	GCA_009907225.1_ASM990722v1_genomic.fna	4502	392	Nigeria_Human_Wound	aac(3)-IIa, aac(6')-Ib-cr, aac(6')-Ib-cr, aadA2, aph(3'')-Ib, aph(3')-Ia, aph(6)-Id, blaCTX-M-82, blaOXA-1, blaSHV-67, blaTEM-1B, catB3, dfrA12, dfrA14, fosA, mph(A), OqxA, OqxA, OqxB, OqxB, qacE, qnrB1, sul1, sul2, tet(A)	IncFIB(K), IncFIB(pNDM-Mar), IncHI1B(pNDM-MAR)	70	347	56(80.0000%)	284(81.8444%)	5359907	5761713	4869697(90.8541%)	4877249(84.6493%)	6	6	231	39	1	3	285	420	2	3	33732	2245
Passed	GCA_009907235.1_ASM990723v1_genomic.fna	872	340	Nigeria_Human	aac(3)-IId, aadA2, aph(3'')-Ib, aph(6)-Id, blaCTX-M-15, blaOXA-48, blaSHV-182, blaTEM-1B, dfrA14, fosA6, OqxA, OqxA, OqxB, OqxB, qacE, sul1, sul2, tet(D)	Col440I, IncFIA(HI1), IncL, IncR, repB(R1701)	70	239	54(77.1429%)	174(72.8033%)	5359907	5281430	4824701(90.0146%)	4827778(91.4104%)	11	6	143	29	0	1	198	298	2	3	30779	1822
Passed	GCA_009907245.1_ASM990724v1_genomic.fna	Y3	48	Nigeria_Human	aac(3)-IIa, aac(6')-Ib-cr, aac(6')-Ib-cr, aadA1, aph(3'')-Ib, aph(3')-Ia, aph(6)-Id, blaCTX-M-15, blaOXA-1, blaSHV-172, blaTEM-1B, catA1, catB3, dfrA1, dfrA14, OqxA, OqxA, OqxB, OqxB, qacE, qnrB1, sul1, sul2	IncFIA(HI1), IncFIB(K), IncFII(K), repB(R1701)	70	185	54(77.1429%)	149(80.5405%)	5359907	5501319	4869191(90.8447%)	4872594(88.5714%)	5	10	120	42	0	3	206	319	0	1	32875	2197
Passed	GCA_009907325.1_ASM990732v1_genomic.fna	UI	17	Nigeria_Human_Urine	aac(3)-IIa, aph(3'')-Ib, aph(6)-Id, blaCTX-M-15, blaSHV-96, blaTEM-1B, dfrA14, fosA, OqxA, OqxA, OqxB, OqxB, sul2, tet(D)	IncFIA(HI1), IncFIB(K), IncR	70	248	62(88.5714%)	209(84.2742%)	5359907	5395809	4881717(91.0784%)	4879803(90.4369%)	3	7	176	49	1	1	256	320	3	3	32837	1861
Passed	GCA_009907335.1_ASM990733v1_genomic.fna	157	14	Nigeria_Human_Blood	aac(3)-IIa, aac(6')-Ib-cr, aac(6')-Ib-cr, aph(3'')-Ib, aph(6)-Id, blaCTX-M-15, blaOXA-1, blaSHV-100, blaTEM-1B, catB3, dfrA14, fosA6, OqxA, OqxA, OqxB, OqxB, qnrB1, sul2, tet(A)	IncFIB(K)	70	141	61(87.1429%)	128(90.7801%)	5359907	5448317	4873521(90.9255%)	4873721(89.4537%)	6	7	107	50	3	5	233	287	1	1	34102	1840
Passed	GCA_009907575.1_ASM990757v1_genomic.fna	1643k	307	Nigeria_Human_Urine	aac(6')-Ib-cr, aac(6')-Ib-cr, aph(3'')-Ib, aph(6)-Id, blaCTX-M-15, blaOXA-1, blaSHV-100, blaTEM-1B, catB3, dfrA14, fosA6, OqxA, OqxA, OqxB, OqxB, qnrB1, sul2, tet(A)	IncFIB(K)	70	168	51(72.8571%)	123(73.2143%)	5359907	5504987	4869210(90.8450%)	4860828(88.2986%)	11	12	97	18	2	3	265	175	2	1	31837	1571
Passed	GCA_009907675.1_ASM990767v1_genomic.fna	4595	35	Nigeria_Human_Urine	aac(3)-IIa, aac(6')-Ib-cr, aac(6')-Ib-cr, aadA16, aph(3'')-Ib, aph(6)-Id, ARR-3, blaCTX-M-15, blaSCO-1, blaSHV-33, blaTEM-1B, catA1, dfrA27, fosA6, OqxA, OqxA, OqxB, OqxB, qacE, qnrB6, sul1, sul2, tet(A)	IncFIA(HI1), IncFIB(K), IncFII(K), repB(R1701)	70	184	56(80.0000%)	143(77.7174%)	5359907	5525895	4845591(90.4044%)	4856083(87.8787%)	7	6	116	43	2	2	202	353	1	4	33810	17268
Passed	GCA_009907705.1_ASM990770v1_genomic.fna	3264	3248	Nigeria_Human_Urine	aac(3)-IIa, aac(6')-Ib-cr, aac(6')-Ib-cr, aph(3'')-Ib, aph(6)-Id, blaCTX-M-15, blaOXA-1, blaSHV-100, blaTEM-1B, catB3, dfrA14, fosA6, OqxA, OqxA, OqxB, OqxB, qnrB1, sul2, tet(A)	IncFIB(K)	70	170	57(81.4286%)	143(84.1176%)	5359907	5568299	4889146(91.2170%)	4891424(87.8441%)	7	5	117	38	1	3	212	302	3	2	32740	1721
Passed	GCA_009907725.1_ASM990772v1_genomic.fna	3682	101	Nigeria_Human_Urine	aac(3)-IIa, aac(6')-Ib-cr, aac(6')-Ib-cr, aph(6)-Id, ARR-3, blaCTX-M-15, blaOXA-1, blaSHV-100, blaTEM-1B, catB3, dfrA14, OqxA, OqxA, OqxB, OqxB, rmtF	IncFIA(HI1), IncFIB(K), IncR	70	246	55(78.5714%)	189(76.8293%)	5359907	5712563	4862077(90.7120%)	4874330(85.3265%)	7	6	142	51	2	2	241	454	2	3	34615	1999
Passed	GCA_009907775.1_ASM990777v1_genomic.fna	3600	789	Nigeria_Human_Urine	aac(3)-IIa, aac(6')-Ib-cr, aac(6')-Ib-cr, aadA16, aph(3'')-Ib, aph(6)-Id, ARR-3, blaCTX-M-15, blaSHV-25, blaTEM-1B, dfrA27, fosA, OqxA, OqxA, OqxB, OqxB, qacE, qnrB2, sul1, sul2, tet(D)	IncFIA(HI1), IncFIB(K), IncR	70	181	62(88.5714%)	141(77.9006%)	5359907	5509592	4886005(91.1584%)	4879631(88.5661%)	4	8	118	49	3	6	241	305	5	1	33068	1888
Passed	GCA_025548125.1_ASM2554812v1_genomic.fna	A145-2	530	Nigeria_Human_Wound	aac(3)-IIa, aph(3'')-Ib, aph(6)-Id, blaCTX-M-15, blaSHV-99, blaTEM-1B, dfrA14, OqxA, OqxA, OqxB, OqxB, sul2, tet(D)	IncFIA(HI1), IncFIB(K), IncR	70	189	56(80.0000%)	95(50.2646%)	5359907	5485252	4851143(90.5080%)	4861039(88.6202%)	9	5	61	45	4	4	188	322	6	2	32371	2010
Passed	GCA_025548215.1_ASM2554821v1_genomic.fna	A135-2	2728	Nigeria_Human_Wound	aac(6')-Ib-cr, aac(6')-Ib-cr, aadA2, aph(3')-Ia, blaCTX-M-15, blaOXA-1, blaSHV-100, blaTEM-1B, dfrA12, fosA6, mph(A), OqxA, OqxA, OqxB, OqxB, qacE, sul1	IncFIB(K)	70	159	54(77.1429%)	111(69.8113%)	5359907	5522811	4817674(89.8835%)	4832872(87.5075%)	7	8	70	47	1	2	195	407	4	3	34078	1744
Passed	GCA_025548305.1_ASM2554830v1_genomic.fna	A117-2	16	Nigeria_Human_Wound	aac(6')-Ib-cr, aac(6')-Ib-cr, aadA2, aph(3')-Ia, blaCTX-M-15, blaOXA-1, blaSHV-148, blaTEM-1B, catB3, dfrA12, mph(A), OqxA, OqxA, OqxB, OqxB, qacE, sul1	Col440II, IncFIB(K)	70	108	55(78.5714%)	53(49.0741%)	5359907	5526697	4888640(91.2076%)	4889475(88.4701%)	12	13	34	50	6	3	197	277	5	3	34024	1804
Passed	GCA_025548395.1_ASM2554839v1_genomic.fna	T79-2	225	Nigeria_Chicken_feces	aac(3)-IIa, aph(3'')-Ib, aph(6)-Id, blaSHV-27, blaTEM-215, fosA6, OqxA, OqxA, OqxB, OqxB, qnrS1, sul2, sul3, tet(A)	IncFIB(K)(pCAV1099-114), IncFII, IncHI1B(pNDM-MAR), IncN	70	214	62(88.5714%)	169(78.9720%)	5359907	5679516	4858795(90.6507%)	4875837(85.8495%)	11	12	140	49	7	6	265	402	2	3	32911	2354
Passed	GCA_025548405.1_ASM2554840v1_genomic.fna	T57-1	490	Nigeria_Chicken_feces	aac(3)-IIa, aph(3'')-Ib, aph(3')-Ia, aph(6)-Id, blaSHV-59, blaTEM-1B, floR, OqxA, OqxA, OqxB, OqxB, qnrS1, sul2, tet(A)	IncFIB(K)(pCAV1099-114), repA(dmsm701b_NDM1), repA(pKOX), repB(R1701)	70	178	53(75.7143%)	74(41.5730%)	5359907	5720206	4844616(90.3862%)	4851555(84.8143%)	12	10	50	44	0	0	198	318	3	4	31841	2348
Passed	GCA_025548455.1_ASM2554845v1_genomic.fna	J6-3	629	Nigeria_Human_Nasal swab	aac(3)-IIa, aac(3)-IV, aac(6')-Ib-cr, aac(6')-Ib3, aadA2, aph(3'')-Ib, aph(3')-Ia, aph(4)-Ia, aph(6)-Id, blaCTX-M-15, blaOXA-1, blaSCO-1, blaSHV-81, blaTEM-1B, catA1, catB3, dfrA12, fosA6, OqxA, OqxA, OqxB, OqxB, qacE, qnrS1, sul1, sul2, tet(A)	IncFIB(K)(pCAV1099-114), IncFIB(pNDM-Mar), IncHI1B(pNDM-MAR)	70	198	57(81.4286%)	127(64.1414%)	5359907	5838147	4897553(91.3738%)	4928274(84.4150%)	14	9	72	44	0	0	189	452	1	1	33018	2013
Passed	GCF_019678755.1_ASM1967875v1_genomic.fna	CVUAS 11650	494	Germany_Pork	blaSHV-61, OqxA, OqxA, OqxB, OqxB, tet(A)	ColRNAI, IncFIB(K)	70	47	40(57.1429%)	42(89.3617%)	5359907	5384470	4763870(88.8797%)	4769696(88.5825%)	9	6	31	36	0	0	140	228	4	7	31731	2024
Passed	HS11286.fna	HS11286	11	NCBI REFSEQ	aac(3)-IId, aadA2, aph(3'')-Ib, aph(6)-Id, blaCTX-M-14, blaCTX-M-14, blaKPC-2, blaSHV-182, blaTEM-1C, blaTEM-1C, blaTEM-1C, dfrA12, fosA6, qacE, rmtB, sul1, sul2, tet(G)	Col(KPHS6), IncC, IncFIB(pKPHS1), IncFII(K), IncR	70	7	54(77.1429%)	5(71.4286%)	5359907	5682322	4809242(89.7262%)	4848233(85.3213%)	14	17	9	62	8	2	179	300	1	4	30596	2058
Passed	Kpn_1725.fna	KPN1725	234	USA_Human_	blaSHV-27, blaSHV-30, fosA6, fosA6, OqxA, OqxA, OqxA, OqxA, OqxB, OqxB, OqxB, OqxB	Col156, ColRNAI, IncFII(29), IncN3	70	98	51(72.8571%)	81(82.6531%)	5359907	5678823	4800209(89.5577%)	4893433(86.1698%)	9	7	64	30	0	0	274	187	3	1	31170	1824
															Average=	8.31818	104.818	43.4545	2.04545	2.40909	220.909	329.227	2.86364	2.68182	32995	2628.55
